# Supplementary material
Source: PubMed Central journal article supplement (PMC9974597)
Supplement: NIHMS1842094-supplement-Supplemental_Publication_Material.pdf [file NIHMS1842094-supplement-Supplemental_Publication_Material.pdf]

**Failure: A Pilot Randomized Trial**

SUPPLEMENTARY MATERIALS

**Figure S1: Example Virtual Consult Note of the Heart Failure Virtual Peer-to-Peer Consult Intervention.**

**Heart Failure Virtual Quality Improvement-based Peer-to-Peer Communication**

**Patient Name:** XXXXXX  
**DOB:** XXXXXX | **MRN:** XXXXXX  
**Date:** XXXXXX | **Length of Stay:** XXXXXX days  
**Attending/Service:** XXXXXX

**Problem:** Heart failure with reduced ejection fraction (ICD-10 I50.1, I50. 2)  
- Type: Last EF 40 (DATE), Last LVEDD 5.0 (DATE), last Cr 1.8 (DATE) / eGFR 40 (DATE), last Na 137 (DATE), last K 3.7 (DATE). NYHA class II.

- Pre-Admission or Started Guideline-directed Medical Therapies on DATE

- > Beta-blocker: metoprolol tartrate 25 mg every 12 hours
- > ACEI/ARB/ARNI: none
- > MRA: none
- > SGLT2i: none
- > Others: none

**Recommendations (at the discretion of the primary rounding team):**  
We recommend the following medication additions or changes as suggestions and can work to facilitate follow-up communication with the patient's outpatient Cardiologist and/or Heart Failure Same Day Access Clinic.

- New Medication initiation or changes:

- > Beta-blocker: suggest transitioning to metoprolol succinate 50 mg daily; up-titrate to a target dose of 100 mg daily. Further titrations can be considered in outpatient HF follow-up.
- > ACEI/ARB/ARNI: Suggest initiating sacubitril/valsartan 24-26 mg BID today. Further titration to target dosing 97-103 mg BID may be considered in outpatient follow-up. Outpatient basic metabolic panel 7-10 days after initiation.
- > MRA: Suggest initiating spironolactone 12.5 mg daily following initiation of sacubitril/valsartan above. May titrate to target dosing as outpatient. BMP in 7-10 days after initiation.
- > SGLT2i: Suggest initiating empagliflozin or dapagliflozin. May be started at a fixed dose of 10mg once daily and does not require titration or lab monitoring.

**Estimated costs to patient for ARNI/SGLT2i:**  
Processed Test Claims in outpatient pharmacy system to Express Scripts (ID: XXXXXX).  
Sacubitril/valsartan # 30 days = \$40; Empagliflozin # 30 days = \$40; Dapagliflozin # 30 days= \$40  
Patient is limited to 30-day supply @ retail. Prices not available for 90-day supply. Patient has commercial insurance and is eligible to use copay cards to reduce above copays at a local pharmacy.

**Transition of HF Care Notes:**

- Prior authorizations not required. Copay card materials provided to primary team.
- Outpatient Cardiologist: XXXXXX
- Next Cardiology Visit: Scheduled XXXXXX.
- Future lab check: BMP 7-10 days after initiation of Sacubitril/valsartan and Spironolactone.
- Please contact our team at discharge and we will communicate further recommendations to outpatient cardiologist or help arrange HF bridge clinic appointment if needed.
